# Supplementary material for: Synthesis of poly(methyl methacrylate)-b-polyethylene (PMMA-b-PE) block copolymers via conventional emulsion polymerization
Source: Royal Society of Chemistry journal article supplement (doi:10.1039/d3py00897e), 2023-01-01
Supplement: d3py00897e1.pdf [file d3py00897e1.pdf]

## Synthesis of poly(methyl methacrylate)-*b*-polyethylene (PMMA-*b*-PE) block copolymers via conventional emulsion polymerization

L. Sinniger,<sup>a</sup> O. Boyron,<sup>a</sup> P.Y. Dugas,<sup>a</sup> G. Patias,<sup>b</sup> D. Lester,<sup>b</sup> D. Haddleton,<sup>b</sup> V. Monteil,<sup>a</sup> M. Lansalot,<sup>\*a</sup> F. D'Agosto<sup>\*a</sup>

<sup>a</sup> Université de Lyon, Université Lyon 1, CPE Lyon, CNRS UMR 5128, Laboratoire CP2M, Equipe PCM, Villeurbanne, 69616, France

<sup>b</sup> University of Warwick, Department of Chemistry, Gibbet Hill, Coventry, CV4 7AL, UK

### Supporting information

#### 1. Reaction of the aqueous phase of PMMA<sub>16</sub> latex with APS

In order to confirm that the shorter chains of the PMMA<sub>16</sub> seed latex were in the aqueous phase and could react with the initiator (APS), this aqueous phase was extracted by centrifugation. The analysis of the latter by <sup>1</sup>H NMR in D<sub>2</sub>O confirmed that short oligomers were indeed located in the continuous phase of this latex (Figure S1a). APS and NaHCO<sub>3</sub> were then added to this aqueous phase under the same conditions than for the seeded emulsion polymerization of ethylene with PMMA<sub>16</sub> (i.e., run 1, Table 2). The solution was stirred during 2 h at 80 °C and the final product was analyzed by <sup>1</sup>H NMR. All the vinyl functions disappeared indicating that they were consumed by reaction with APS in the medium (Figure S1b).

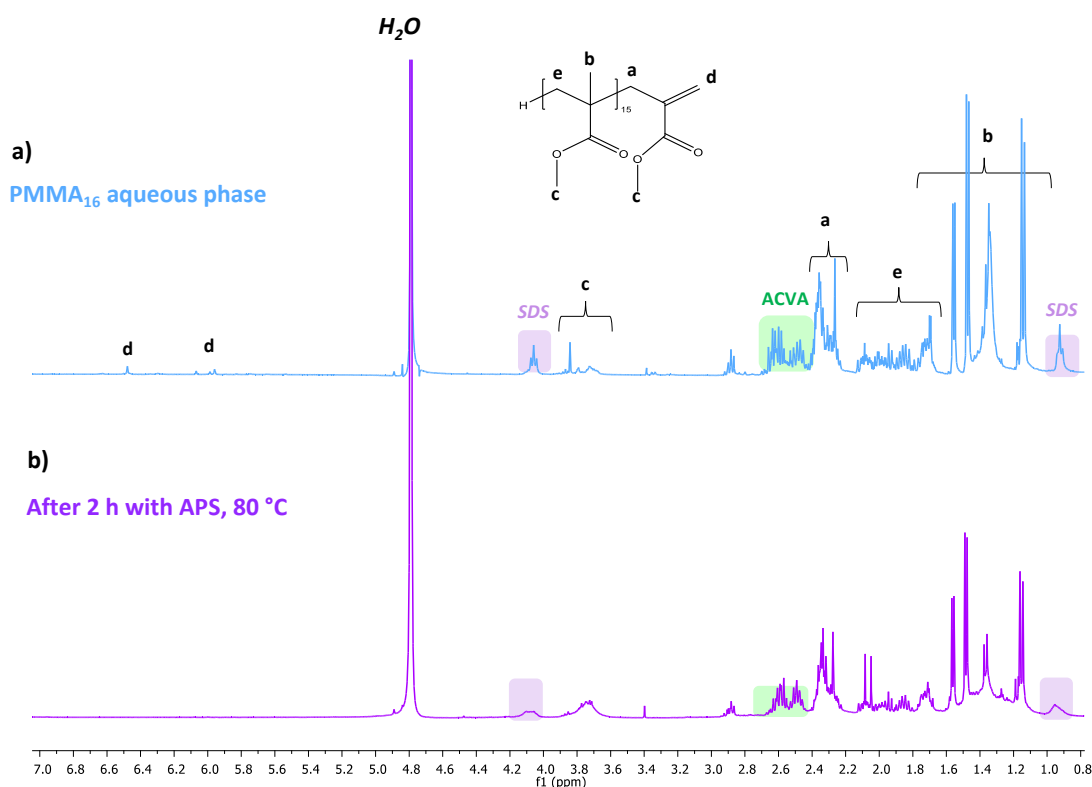

**Figure S1.** <sup>1</sup>H NMR spectra (400 MHz, D<sub>2</sub>O at 25 °C) of a) the aqueous phase of PMMA<sub>16</sub> and b) the product of reaction after 2 h at 80 °C.

## 2. Study of the formation of PE homopolymer by FT-IR analysis

a)

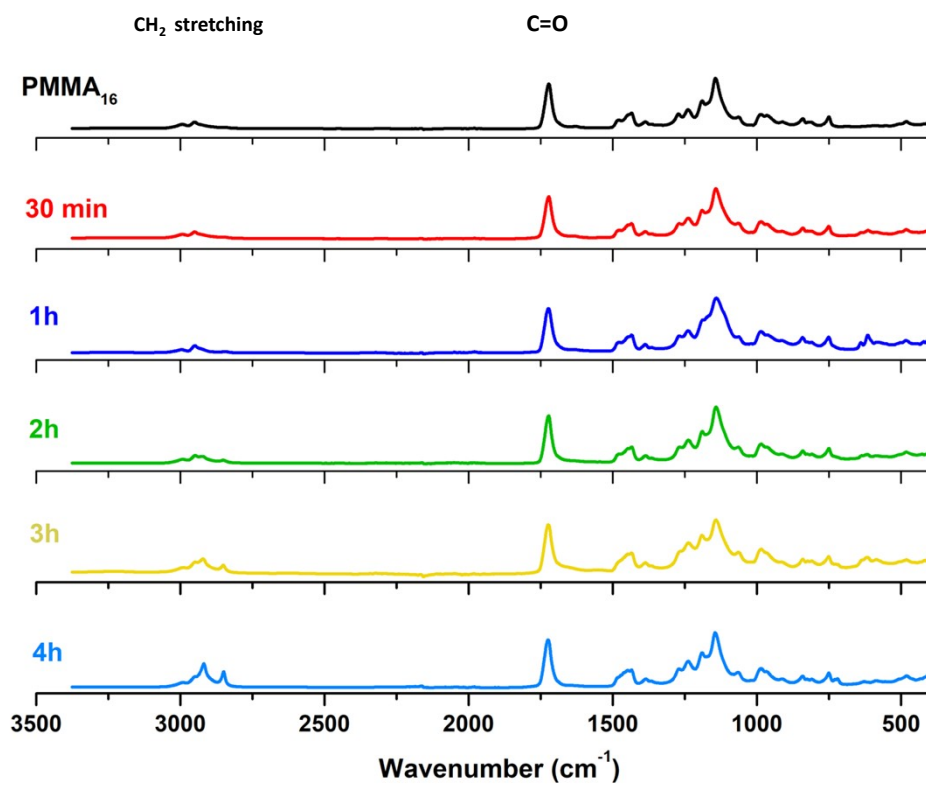

b)

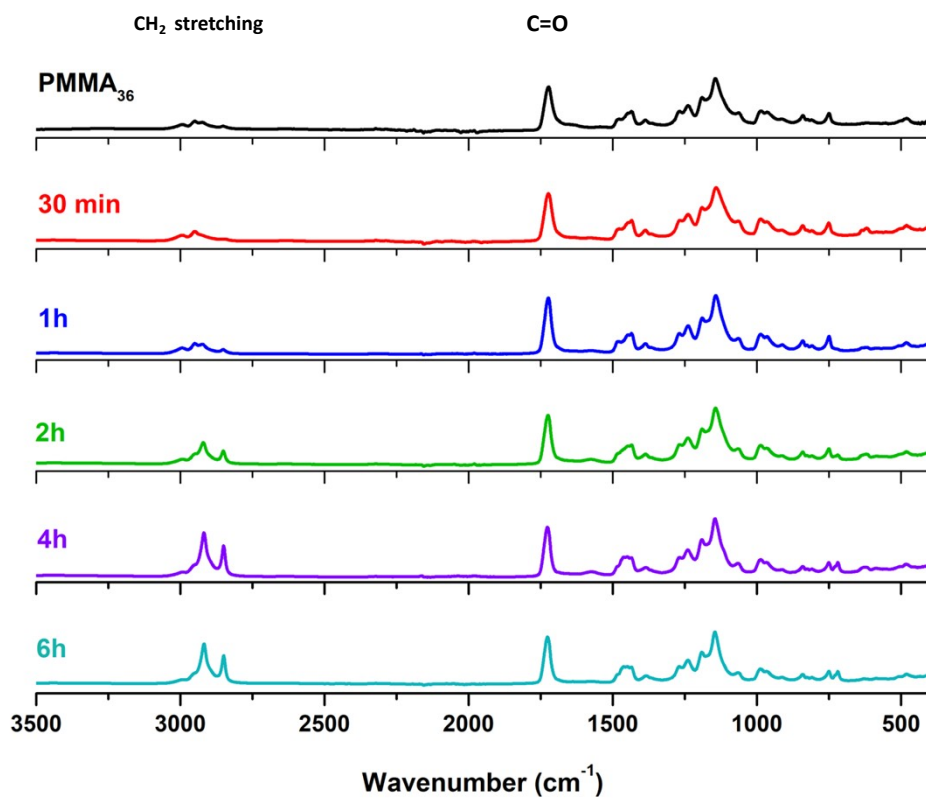

Figure S2. FT-IR spectra of copolymers obtained with a) PMMA<sub>16</sub> and b) PMMA<sub>36</sub> (respectively runs 3 and 4 in Table 2).

Thermal analysis by DSC (heating curves)

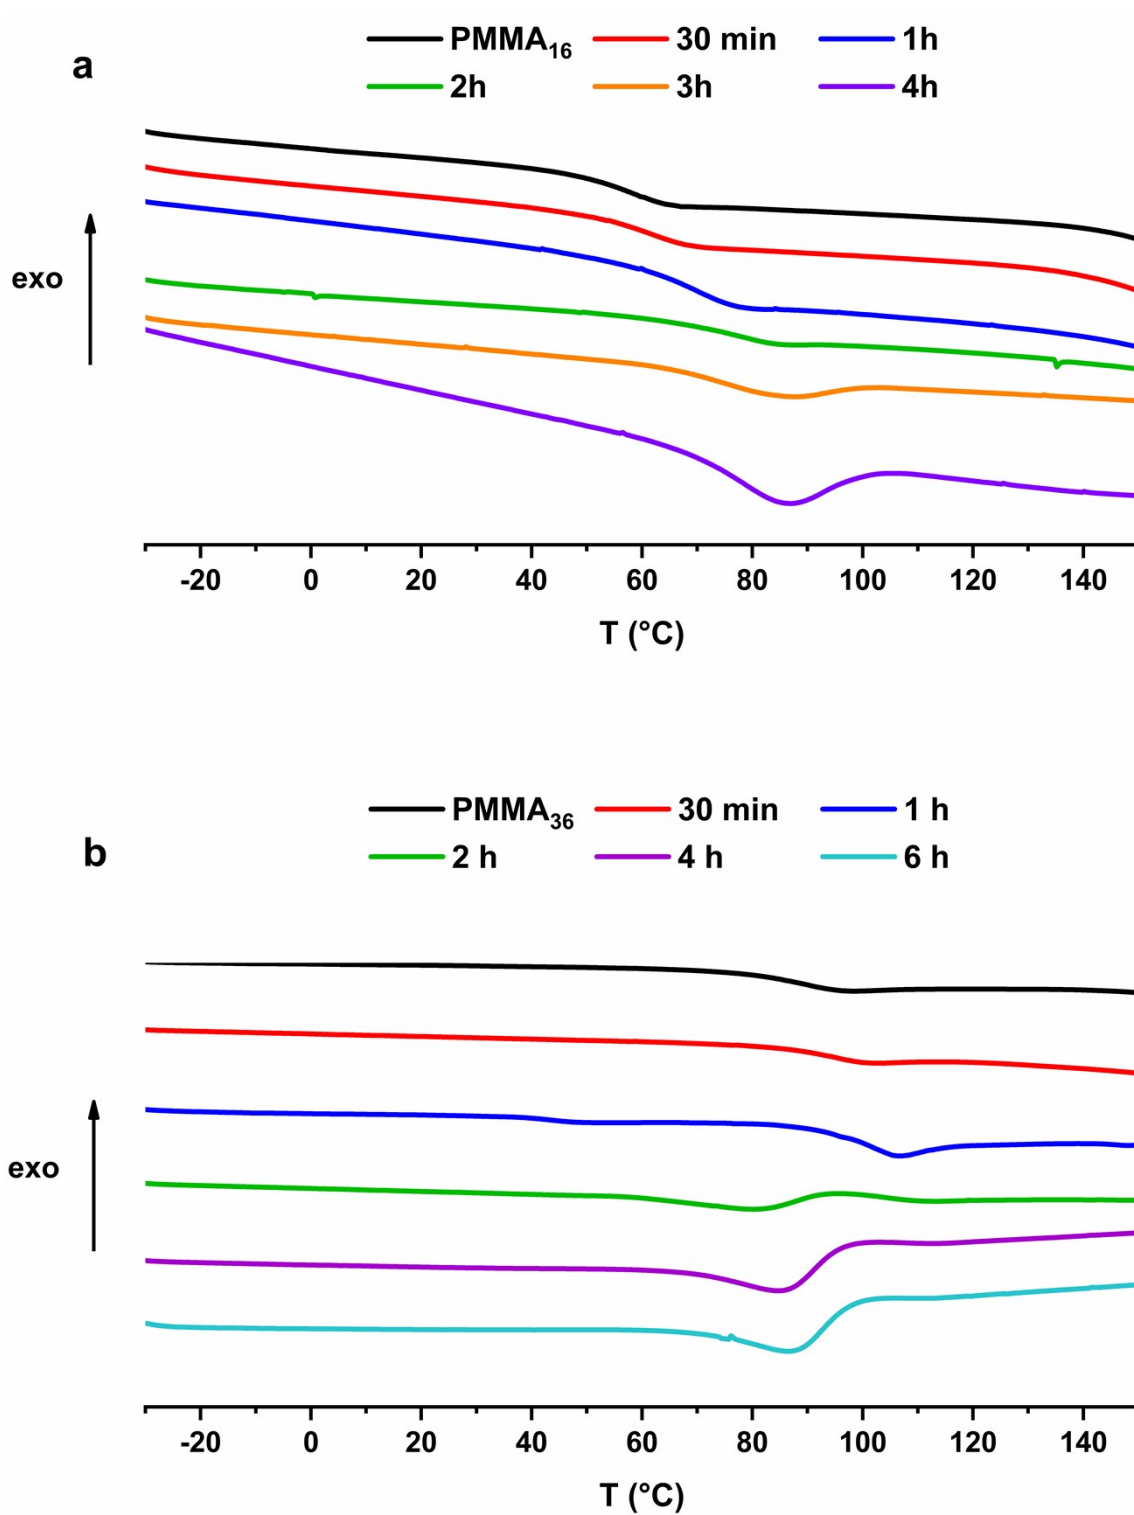

Figure S3. DSC analyses (heating) of the samples presented Table 2 for the polymerization with a) PMMA<sub>16</sub> and b) PMMA<sub>36</sub>.

### 3. Synthesis of polyethylene by radical emulsion polymerization in water

In order to compare the thermal behavior of these PMMA<sub>16</sub>-*b*-PE to a physical blend of PMMA<sub>16</sub> and PE, a PE homopolymer was synthesized by radical emulsion polymerization in water. The synthesis was adapted from previous work realized by our group with APS and SDS<sup>1</sup> to be in similar conditions than the seeded system used in this work with PMMA<sub>x</sub> latexes.

APS (41.1 mg, 0.18 mmol), SDS (150 mg, 0.52 mmol) and NaHCO<sub>3</sub> (50.4 mg, 0.60 mmol) were dissolved in water (50 mL) and this solution was introduced after deoxygenating into the preheated and inert autoclave at 80 °C. Ethylene gas was then introduced into the reactor until the desired pressure (100 bar) was reached. The reaction medium was stirred at 250 rpm during 4 h. The autoclave was cooled with iced water. When the temperature inside the autoclave dropped below 35 °C, the remaining pressure was carefully released. The latex was dried before being mixed with PMMA<sub>16</sub> dried latex.

The DLS analysis revealed that the latex was composed of two particles populations, a majority of small particles (around 40 nm) and some big particles (around 600 nm). The dried extract was analyzed by HT-SEC and presented in Figure S4.

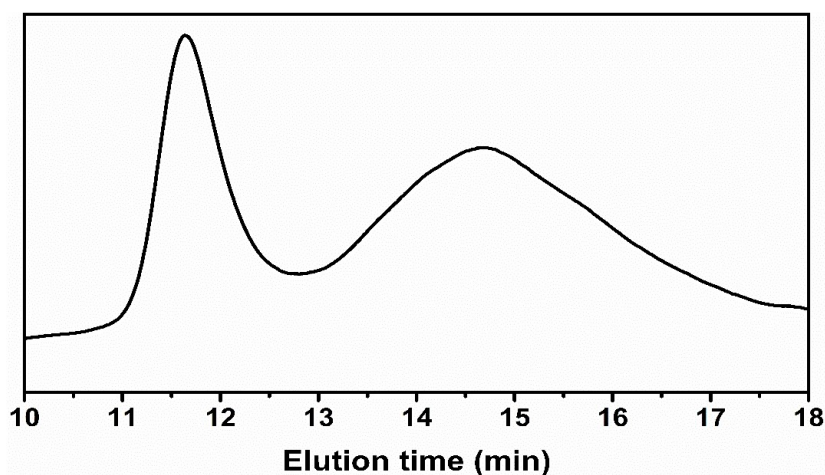

**Figure S4.** HT-SEC chromatogram of the dry extract from the PE homopolymer synthesized by radical emulsion polymerization.

### 4. Synthesis of PMMA by free radical emulsion polymerization in water

**Table S1.** Aqueous free radical emulsion polymerization of MMA<sup>[a]</sup>

| Run      | <i>t</i><br>(h) | $\tau_{s,f}^{[b]}$<br>(%) | $X_{MMA}^{[b]}$<br>(%) | $Z_{ave}^{[c]}$<br>(nm) | PDI <sup>[c]</sup> | $M_{n, SEC}^{[d]}$<br>(g mol <sup>-1</sup> ) | $\mathcal{D}^{[d]}$ | $T_g^{[e]}$<br>(°C) |
|----------|-----------------|---------------------------|------------------------|-------------------------|--------------------|----------------------------------------------|---------------------|---------------------|
| PMMA-FRP | 0               | 10.2                      | 96                     | 42                      | 0.07               | 138 000                                      | 5.5                 | 106                 |

[a] KPS (4 mM), NaHCO<sub>3</sub> (8 mM), SDS (14 mM), MMA (10 wt%) and water (100 mL) at 70 °C. [b] Determined by gravimetric analysis. [c] Determined by DLS, in intensity. [d] Determined by SEC-THF. [e] Determined by DSC.

## References

1. F. Baffie, G. Patias, A. Shegiwal, F. Brunel, V. Monteil, L. Verrieux, L. Perrin, D. M. Haddleton and F. D'Agosto, *Angew. Chem. Int. Ed.*, 2021, **60**, 25356–25364.
